# Supplementary material for: Palladium-mediated cross-coupling reactions with supported reagents in supercritical carbon dioxideElectronic supplementary information (ESI) available: experimental procedures for the preparation of compounds 4a-c. See http://www.rsc.org/suppdata/cc/b1/b111430a/
Source: Royal Society of Chemistry journal article supplement (doi:10.1039/b111430a), 2002-02-25
Supplement: b111430a.doc [file b111430a.doc]

**Supplementary data**

­**Typical procedure for Heck reaction involving *t*Bu3P and polymer supported amine resin 1 in presence of Pd(OCOCF3)2**

Commercially available diethylaminomethylpolystyrene **1** (1 g, ~3.2 *ca.* mmol/g), iodobenzene **3a** (0.23 ml, 2.0 mmol), butyl acrylate **2** (0.29 ml, 2.0 mmol), tri-*t*-butylphosphine (25 mg, *ca.* 0.023 mmol) and palladium(II)trifluoroacetate (33 mg, 0.01 mmol) were placed in a 10 cm3 stainless steel pressure cell which was equipped with inlet and outlet fittings, a thermocouple, a sapphire window, and a magnetic stir bar. . The cell was then connected to a CO2 compressor (NWA PM 101 compressor pump) and charged with CO2 (previously dried and deoxygenated by passing CO2 over activated OxisorbTM catalyst) to a pressure of approximately 900 psi (half full of liquid carbon dioxide). The cell was heated to 80 ºC and the pressure was adjusted to *ca*. 3000 psi by the addition of CO2 using a NWA pressure pump. The reagents were stirred at this temperature and pressure for 16 h, and the cell was then allowed to cool to room temperature (*ca.* 25 °C). The contents of the cell were vented into ethyl acetate (100 cm3). Once atmospheric pressure had been reached the cell was opened and rinsed out with further ethyl acetate (20 cm3). The organic fractions were filtered through a sinter and the resulting solution was concentratedunder reduced pressure. The crude product was purified by column chromatography on silica gel, eluting with ethyl acetate-hexane (1:49) to give **4a** as a colourless oil (410 mg, 100 %), whose spectroscopic properties were identical to literature values.1

**Typical procedure for Heck reaction under phosphine-free conditions involving polymer supported amine resin 1 in presence of Pd(OAc)2.**

Commercially available diethylaminomethylpolystyrene **1** (1 g, ~3.2 *ca.* mmol/g), iodobenzene **3a** (0.35 ml, 3.1 mmol), butyl acrylate **2** (0.6 ml, 4.0 mmol) and palladium(II)acetate (22 mg, 0.01 mmol) were placed in a 10 cm3 stainless steel pressure cell which was equipped and filled with CO2 as before. The cell was heated to 100 ºC and the pressure was adjusted to *ca*. 3000 psi by the addition of CO2 using a NWA pressure pump. The reagents were stirred at this temperature and pressure for 16 h, and the cell was then allowed to cool to room temperature (*ca.* 25 °C). The contents of the cell were vented into ethyl acetate (100 cm3). Once atmospheric pressure had been reached the cell was opened and rinsed out with further ethyl acetate (20 cm3). The organic fractions were filtered through a sinter and the resulting solution was concentratedunder reduced pressure. The crude product was purified by column chromatography on silica gel, eluting with ethyl acetate-hexane (1:49) to give **4a** as a colourless oil (580 mg, 93 %), whose spectroscopic properties were identical to literature values.1

**Preparation of polymer supported palladium complex 5.**

Preparation of diphenylphosphinemethylpolystyrene(DPPP) / Pd(OAc)2 **5** complex was achieved by stirring a solution of DPPP (3.27 g, 4.48 mmol) and Pd(OAc)2 (226 mmol, 1 mmol) in dichloromethane (20 ml) for 24 h. Filtration of the resultant resin while washing with dichloromethane (3 x 30 cm3), methanol (3 x 30 cm3) and diethyl ether (6 x 30 cm3) afforded the Pd-polystyrene complex **5** (3.45g, *ca.* 100 %).

**Typical procedure for the Heck Reaction involving palladium-supported palladium salt 5 in supercritical carbon dioxide.**

The polymer supported palladium phosphine catalyst **5**16 (200 mg, 60 mol), iodobenzene (0.2 ml, 2 mmol), butyl acrylate (0.32 ml, 2.2 mmol) and *N*,*N*,*N*,*N*-tetramethylhexanediamine (0.86 ml, 4 mmol) were placed in a 10 cm3 stainless steel pressure cell which was equipped with inlet and outlet fittings, a thermocouple, a sapphire window, and a magnetic stir bar. . The cell was then connected to a CO2 compressor (NWA PM 101 compressor pump) and charged with CO2 (previously dried and deoxygenated by passing CO2 over activated OxisorbTM catalyst) to a pressure of approximately 900 psi (half full of liquid carbon dioxide). The cell was heated to 80 ºC and the pressure was adjusted to *ca*. 3000 psi by the addition of CO2 using a NWA pressure pump. The reagents were stirred at this temperature and pressure for 16 h, and the cell was then allowed to cool to room temperature (*ca.* 25 °C). The contents of the cell were vented into ethyl acetate (100 cm3). Once atmospheric pressure had been reached the cell was opened and rinsed out with further ethyl acetate (20 cm3). The organic fractions were reduced *in vacuo* to give the crude product which was purified by column chromatography on silica gel, eluting with ethyl acetate-hexane (1:49) to give a colourless oil (340 mg, 84 %), whose spectroscopic properties were identical to literature values.1

**Typical procedure for Heck reaction involving polymer supported palladium salt 5 with tetraalkylammonium salts.**

To a stainless steel reactor (10 ml) equipped as before was added 4-chloronitrobenzene **3e** (170 mg, 1.1 mmol), butyl acrylate **2** (0.2 ml, 1.3 mmol), **5** (100 mg, 3 mmol) and tetrabutylammonium acetate (800 mg, *ca* 2 mmol). This was sealed under an atmosphere of CO2 (*ca*. 800 psi). The reaction was heated at 100 C for 16 h, upon which the reaction was cooled to room temperature and vented into a beaker containing EtOAc (50 cm3). The cell was rinsed with ethyl acetate (10 cm3) and the washings were pooled with the vented solution. Silica gel was added (*ca* 10 g) and the solvent was removed under reduced pressure. Column chromatography of the crude product (loaded with adsorbed silica, ethyl acetate/hexane 1:4 as eluent) afforded **4c** (184 mg, 67 %) whose spectroscopic properties were identical to reported values.

**Typical experiment for Suzuki reaction carried out using polymer supported palladium salt 5.**

To a stainless steel reactor (10 cm3) equipped as before was added iodobenzene **3a** (0.12 ml, 1.2 mmol), tolylboronic acid **6** (170 ml, 1.2 mmol), the palladium-supported resin **5** (30 mg, 10 mol) and *N*,*N*,*N*,*N*-tetramethylhexane-1,6-diamine (0.25 cm3, 1.5 mmol). This was sealed under an atmosphere of CO2 (*ca*. 800 psi). The reaction was heated at 100 C for 16 h, upon which the reaction was cooled to room temperature (25 °C) and vented into a beaker containing EtOAc (50 cm3). The cell was rinsed with liquid CO2 (2 x 10 cm3) and vented into the same EtOAc solution. The solvent was removed under reduced pressure to yield a residue (306 mg). HPLC analysis of the mixture, using 1,4-dimethoxybenzene as an internal standard, showed a yield of **7** (64 %). Spectroscopic characterisation was in accordance with reported literature. 3

All other compounds exhibited spectroscopic data identical to the published data.

**References:**

1. J. P. Parrish, E. E. Dueno, S.-I. Kim and K. W. Jung, *Synth*. *Commun*., 2000, **30**, 2687.
2. M. Miura, H. Hashimoto, K. Itoh and M. Nomura, *J. Chem. Soc., Perkin Trans. I*., 1990, 2207.
3. M. A. Andrus and C. Song, *Chem. Lett.*, 2001, **3**, 3761.
